# Supplementary material
Source: HighWire-hosted journal article supplement (https://bjo.bmj.com/content/106/4/568)
Supplement: inline-supplementary-material-2 [file inline-supplementary-material-2.pdf]

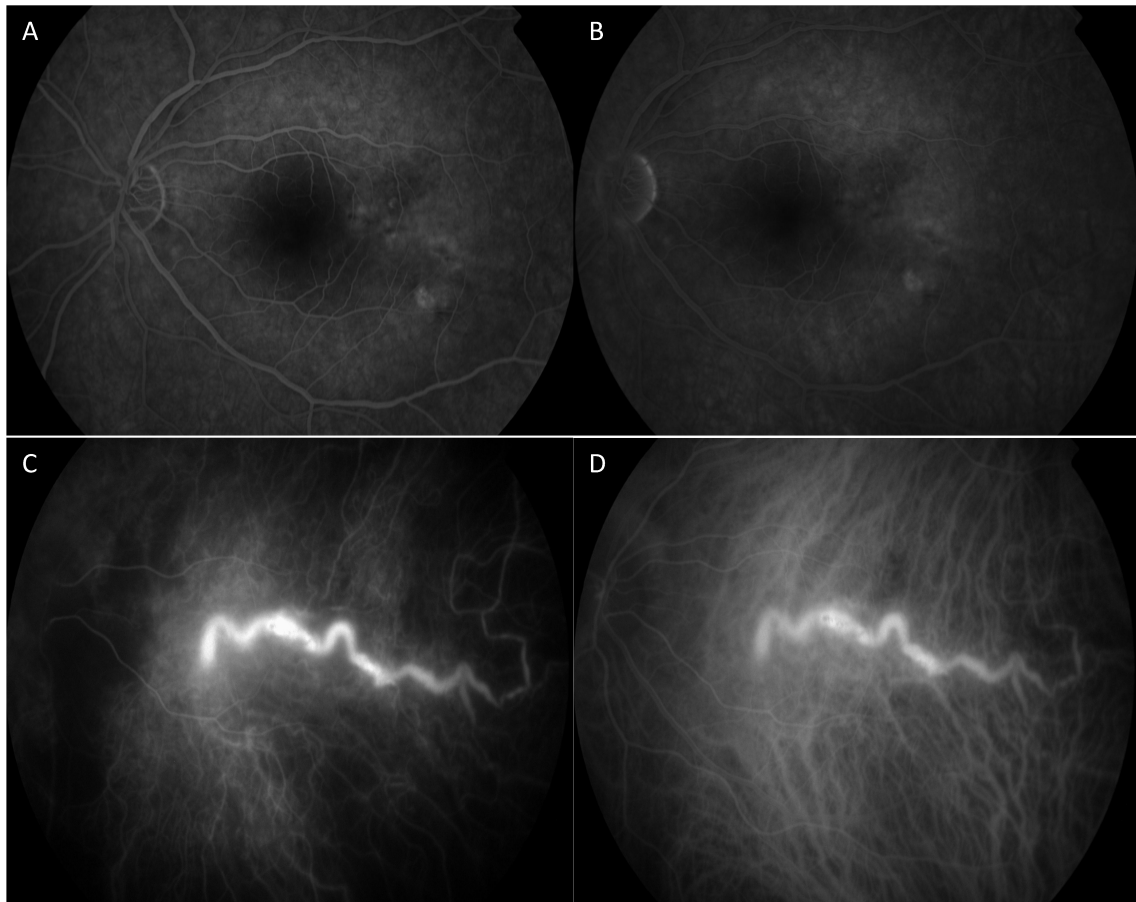

**Figure II:** Left eye FFA and ICGA of a patient with macular CM. A-B: on FFA the CM presents an early focal hyperfluorescence, due to window defects, that in the late phases does not increase in intensity or width and shows staining. C-D: on ICGA the CM has an early lighting up and a serpiginous shape; in the later phases the fluorescence decreases and focal spots of hypofluorescence along the vessel become visible.
